# Supplementary material
Source: PubMed Central journal article supplement (PMC5380517)

**Figure S1**

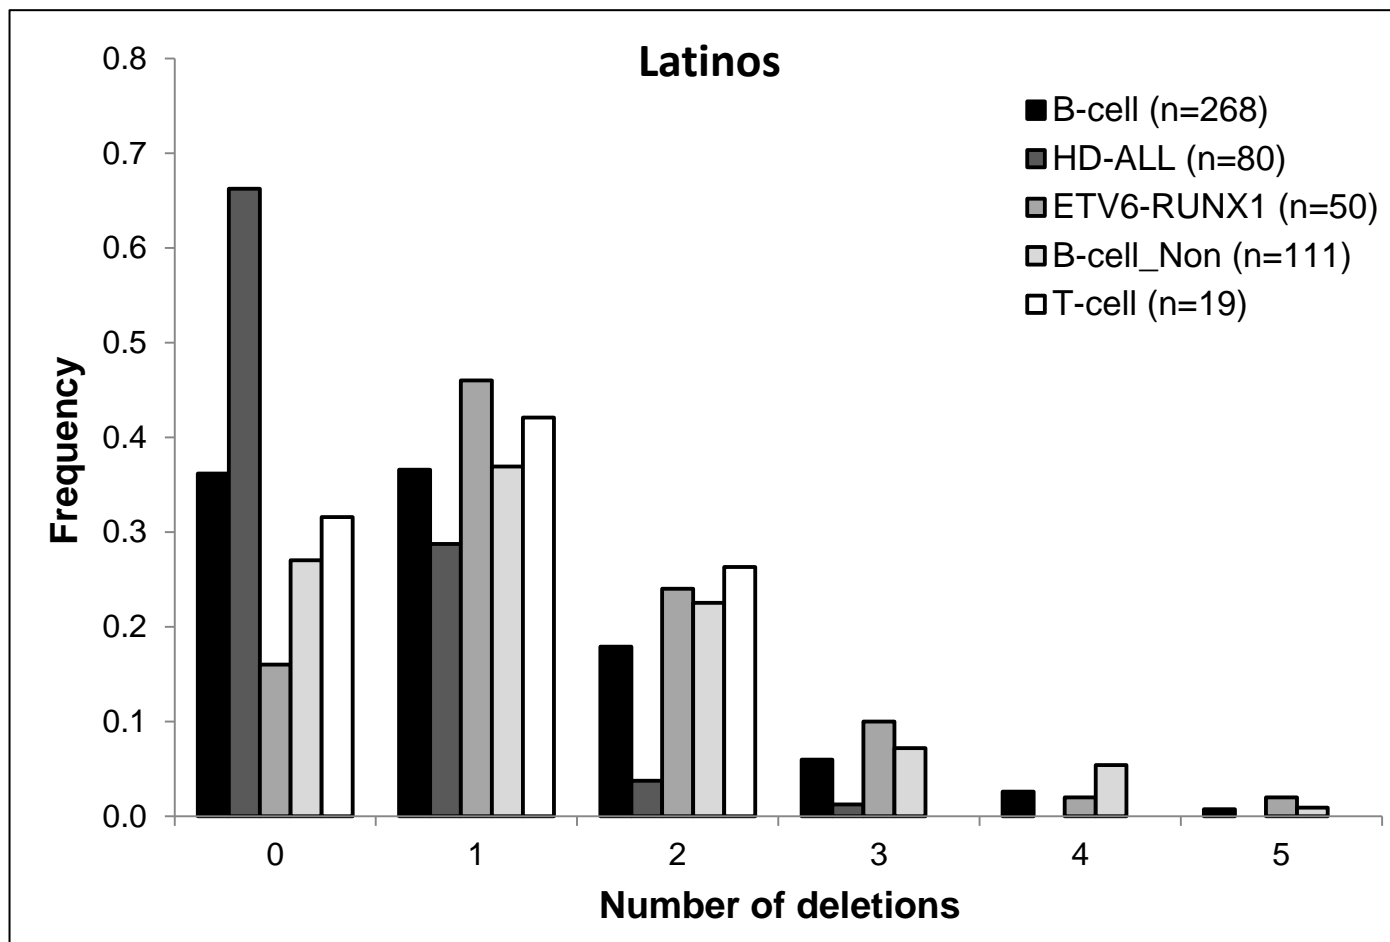

Figure S2

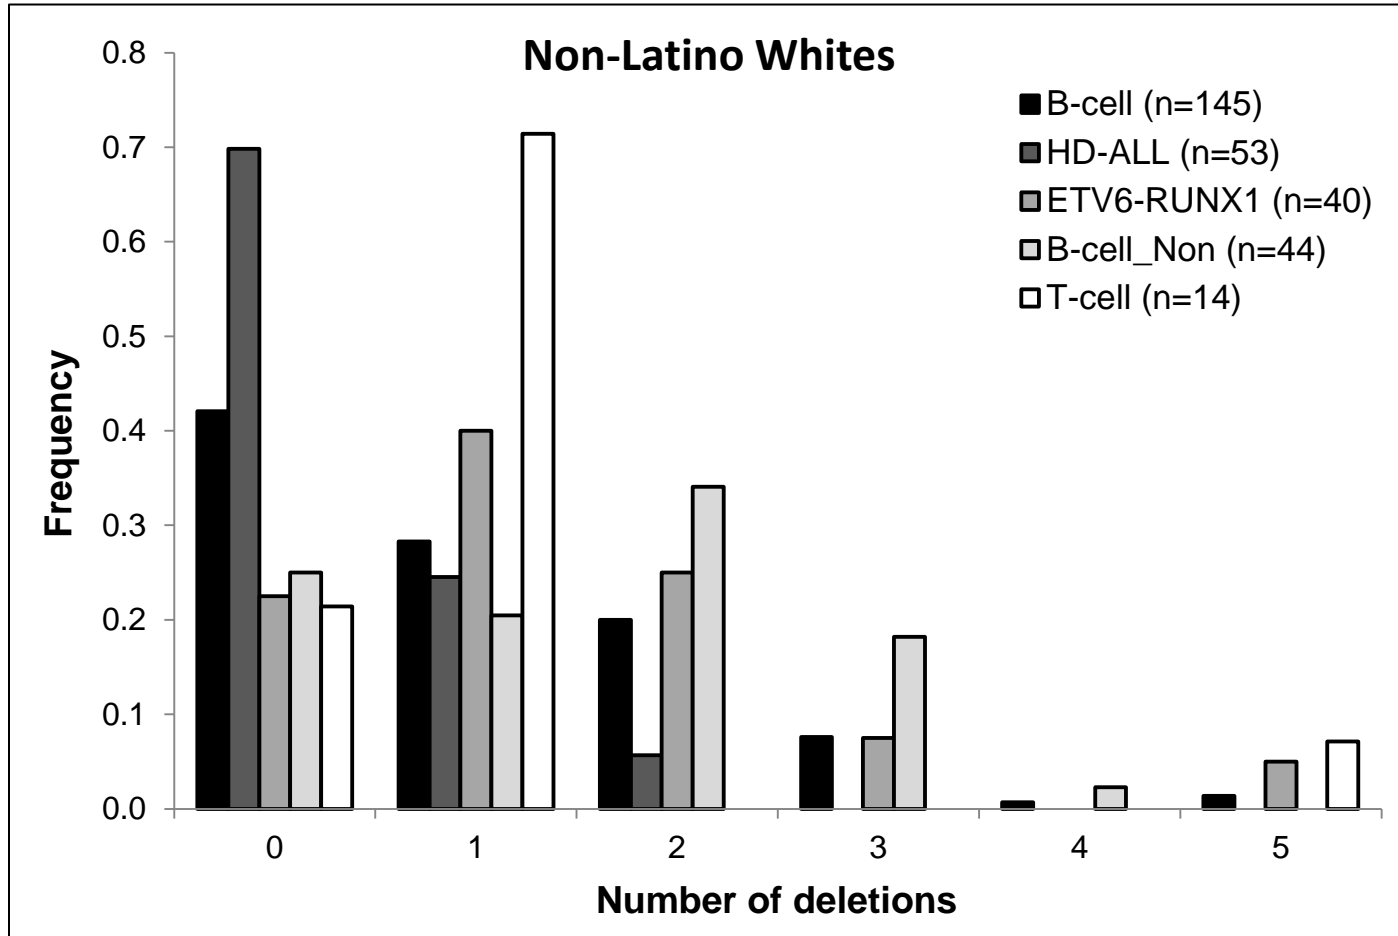

**Figure S3**

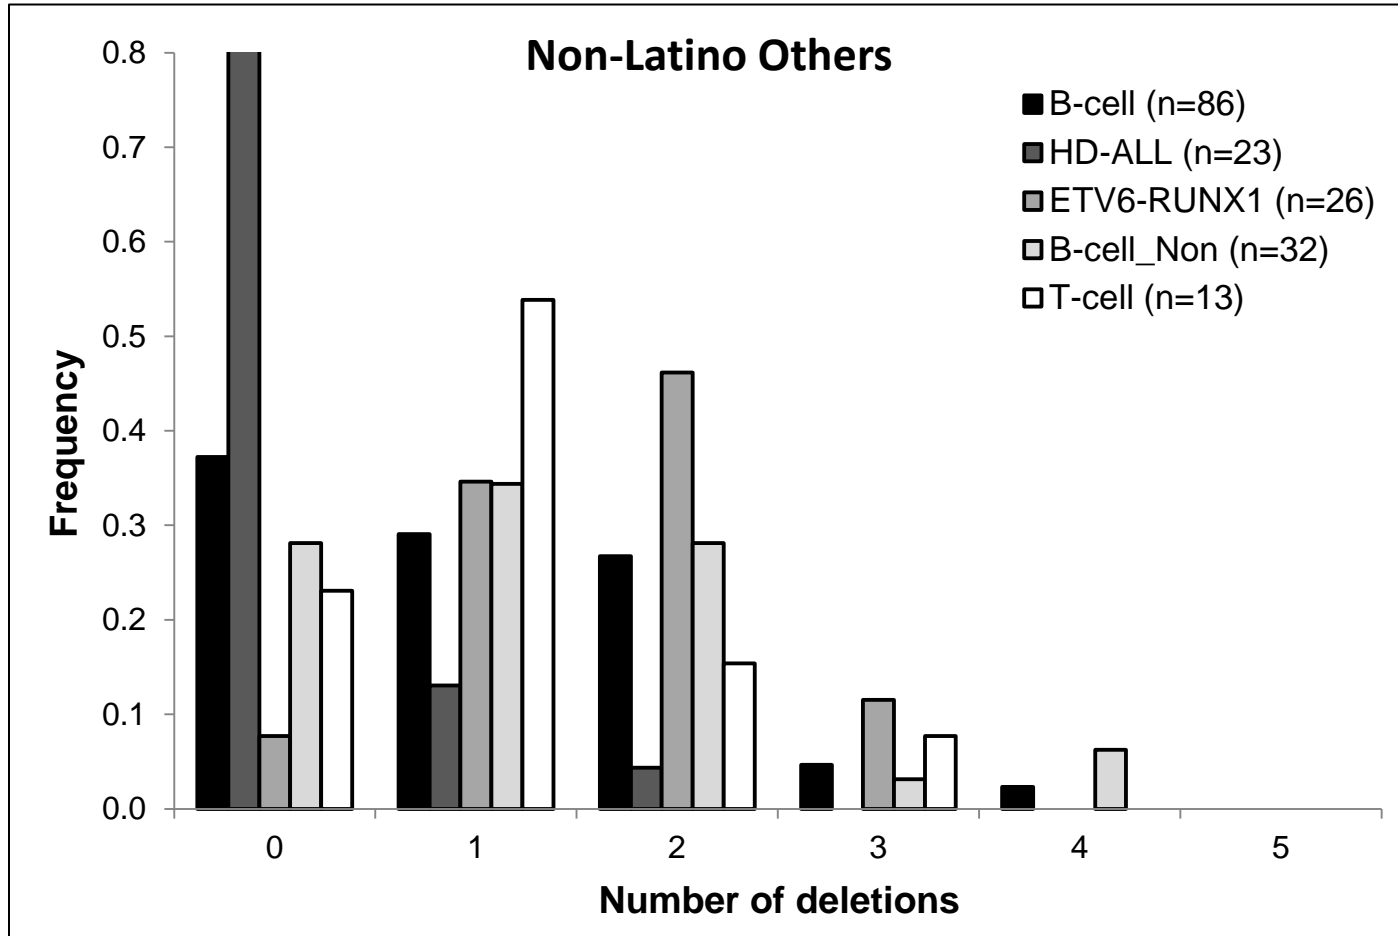

Figure S4

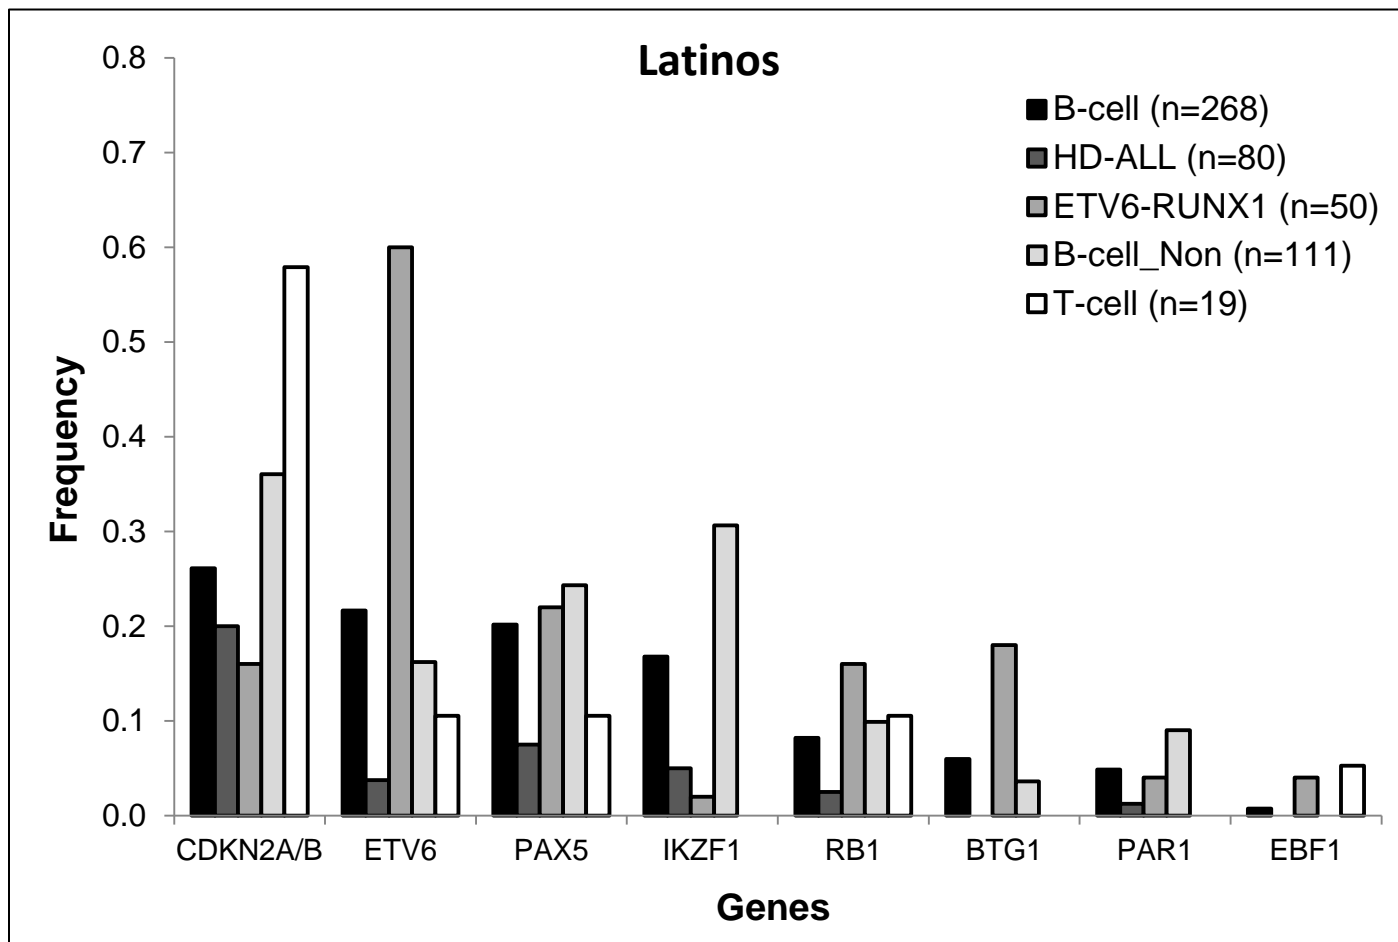

Figure S5

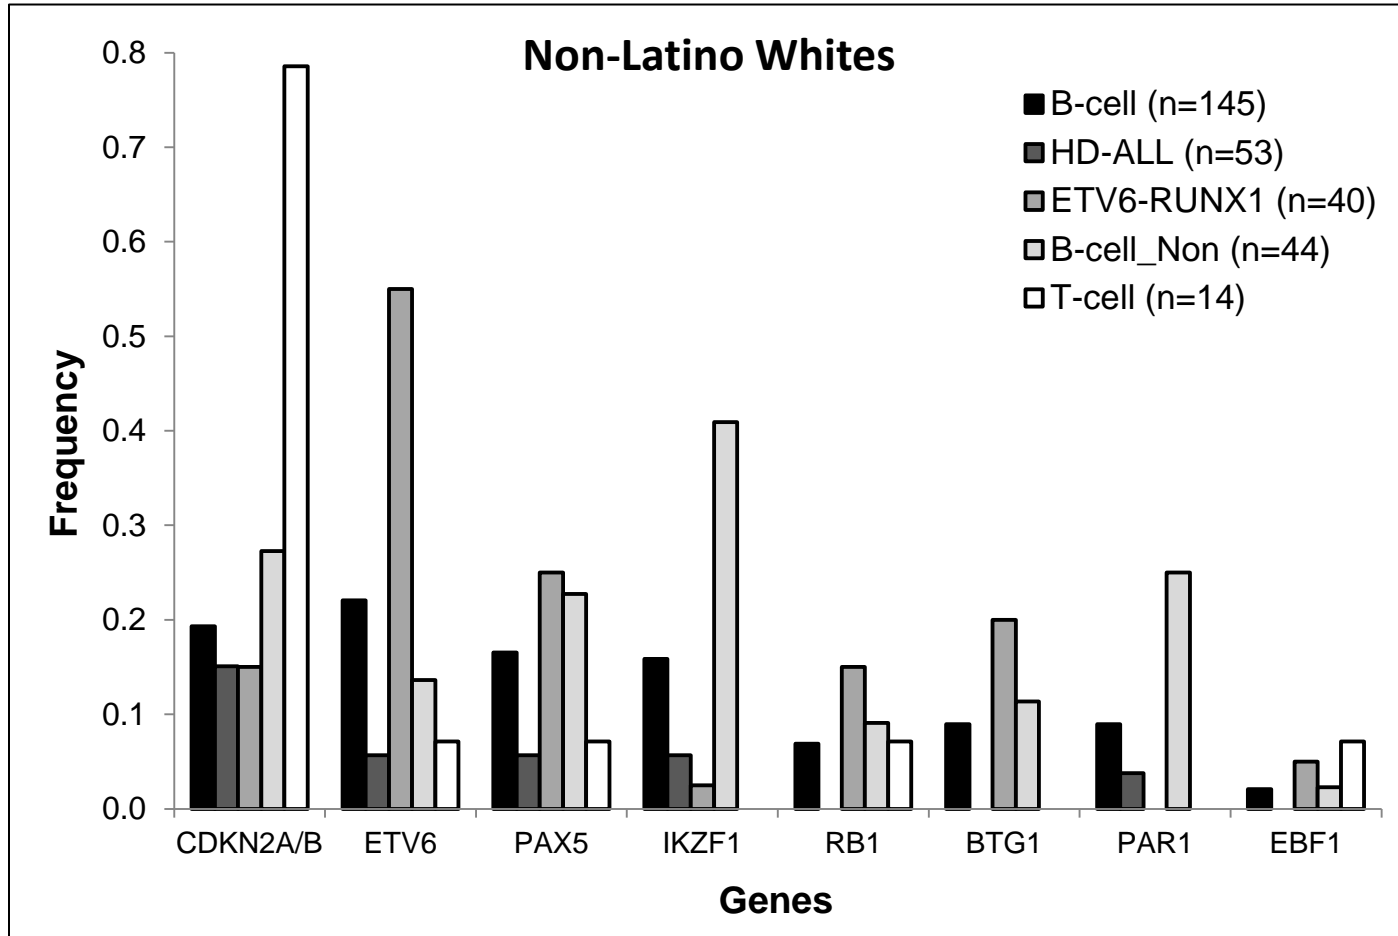

Figure S6

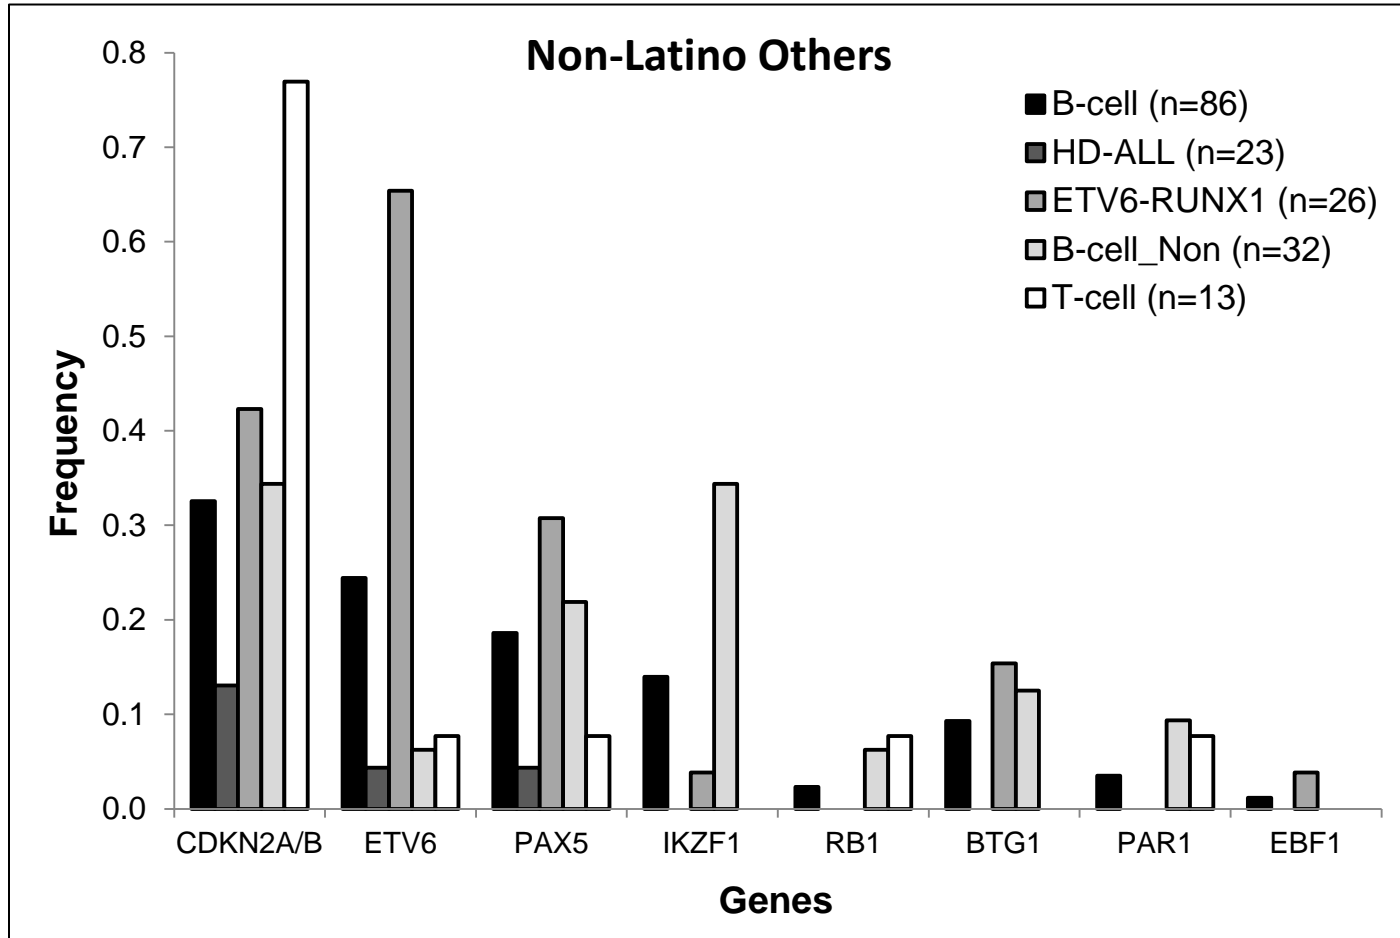

**Figure S7**

**Average marginal effects of paternal smoking during preconception**

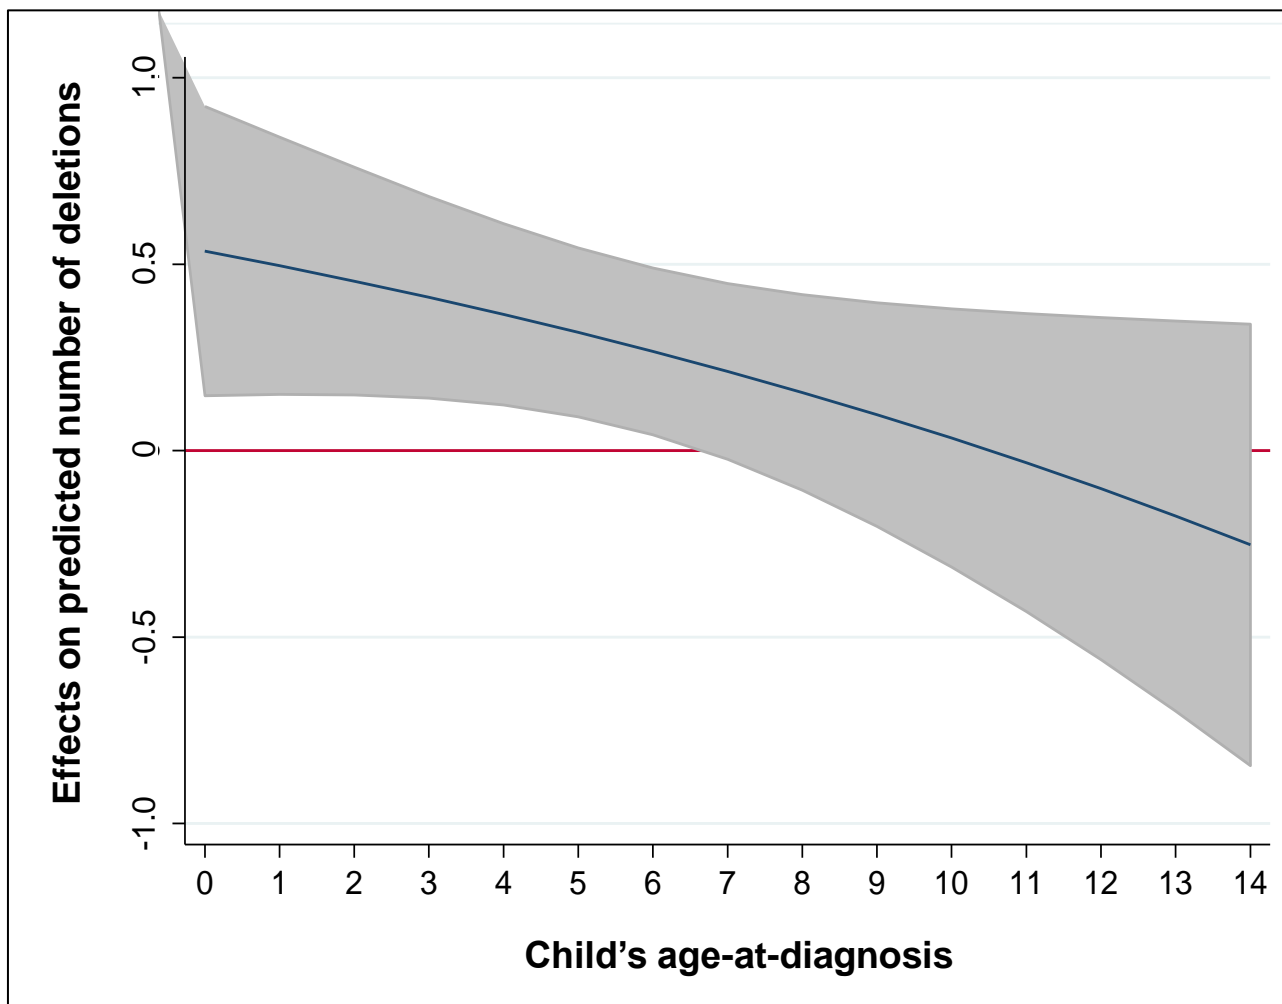

Supplement: NIHMS847601-supplement-2.pdf [file NIHMS847601-supplement-2.pdf]
